# Supplementary material for: Translational derepression of Elavl4 isoforms at their alternative 5′ UTRs determines neuronal development
Source: PubMed Central journal article supplement (PMC7125149; doi:10.1038/s41467-020-15412-8), 2020-04-03
Supplement: 41467_2020_15412_MOESM2_ESM.pdf [file 41467_2020_15412_MOESM2_ESM.pdf]

## **Description of Additional Supplementary Files**

File Name: Supplementary Data 1

Description: Derepressed and repressed mRNAs at E16.

File Name: Supplementary Data 2

Description: Derepressed and repressed mRNAs encode risk genes associated with neurodevelopmental disorders.

File Name: Supplementary Data 3

Description: Derepressed and repressed mRNAs are known FMRP targets.

File Name: Supplementary Data 4

Description: Additional primers list.
